## ADRENERGIC INHIBITION OF CARBON DIOXIDE EXCRETION BY TROUT RED BLOOD CELLS *IN VITRO* IS MEDIATED BY ACTIVATION OF $\text{Na}^+/\text{H}^+$ EXCHANGE

By S. F. PERRY II, C. M. WOOD\*, S. THOMAS† AND P. J. WALSH‡  
*Department of Biology, University of Ottawa, 30 George Glinski, Ottawa, Ontario, K1N 6N5 Canada*

*Accepted 21 January 1991*

### Summary

We have used a sensitive new technique to assess the mechanism(s) of adrenergic inhibition of rainbow trout (*Oncorhynchus mykiss*) red blood cell (RBC) carbon dioxide excretion *in vitro*. The effect was only apparent using blood acidified to simulate metabolic acidosis. Red blood cell  $\text{CO}_2$  excretion was inhibited in a dose-dependent manner by physiologically relevant concentrations of noradrenaline ( $10\text{--}1000\text{ nmol l}^{-1}$ ) or adrenaline ( $100\text{--}1000\text{ nmol l}^{-1}$ ). The  $\beta$ -adrenoceptor antagonist propranolol abolished the inhibitory effect of noradrenaline, whereas the  $\alpha$ -adrenoceptor antagonist phentolamine was without effect. The action of noradrenaline on RBC  $\text{CO}_2$  excretion was mimicked by the  $\beta$ -adrenoceptor agonist isoproterenol, but not by the  $\alpha$ -adrenoceptor agonist phenylephrine. Therefore, adrenergic inhibition of  $\text{CO}_2$  excretion is mediated by RBC  $\beta$ -adrenoceptors, presumably of the  $\beta_1$  subtype. The  $\text{Na}^+/\text{H}^+$  exchange inhibitor amiloride effectively blocked adrenergic stimulation of  $\text{Na}^+/\text{H}^+$  exchange (as indicated from measurements of pHe and RBC pH<sub>i</sub>) and entirely prevented the inhibition of  $\text{CO}_2$  excretion. Noradrenaline significantly reduced the rate of  $\text{CO}_2$  excretion even in the presence of the  $\text{Cl}^-/\text{HCO}_3^-$  exchange inhibitor SITS. Therefore, adrenergic inhibition of  $\text{CO}_2$  excretion is accomplished *via* activation of RBC  $\text{Na}^+/\text{H}^+$  exchange rather than by a direct inhibition of  $\text{Cl}^-/\text{HCO}_3^-$  exchange. The observed relationship between  $\text{CO}_2$  excretion rates and the RBC transmembrane pH difference (pHe–pH<sub>i</sub>) and the occurrence of the inhibition only at low pHe provide further evidence of the linkage with RBC  $\text{Na}^+/\text{H}^+$  exchange. We suggest that adrenergic activation of RBC

\*Present address and address for reprint requests: Department of Biology, McMaster University, 1280 Main Street West, Hamilton, Ontario L8S 4K1, Canada.

†Present address: CNRS Laboratoire de Physiologie Animale, Faculté des Sciences et Techniques, Université de Bretagne Occidentale, 6 Avenue Victor Le Gorgeu, 29287 Brest, France.

‡Present address: Rosenstiel School of Marine and Atmospheric Science, Division of Marine Biology and Fisheries, University of Miami, 4600 Rickenbacker Causeway, Miami, Florida, USA.

Key words: *Oncorhynchus mykiss*, red blood cell, catecholamine, carbon dioxide,  $\text{Na}^+/\text{H}^+$  exchange,  $\text{CO}_2$  excretion, bicarbonate dehydration, intracellular pH,  $\beta$ -receptors.

$\text{Na}^+/\text{H}^+$  exchange impedes  $\text{CO}_2$  excretion by causing a rise in intracellular  $\text{HCO}_3^-$  levels concurrent with a reduction of intracellular  $P_{\text{CO}_2}$ . The net result is a reduced gradient for  $\text{HCO}_3^-$  entry into the RBC in conjunction with a diminution of the outwardly directed  $P_{\text{CO}_2}$  gradient. Thus, the rate of formation of  $\text{CO}_2$  from the dehydration of plasma  $\text{HCO}_3^-$  is reduced and, in turn, a portion of this  $\text{CO}_2$  is not excreted but recycled through the red blood cell.

### Introduction

In the previous paper, we have developed a sensitive new *in vitro* assay to measure the rate of  $\text{CO}_2$  excretion by trout blood under conditions comparable to those *in vivo* (Wood and Perry, 1991). Using this assay, we confirmed that, under the typical post-exercise condition of metabolic acidosis, catecholamines cause a transient inhibition of  $\text{CO}_2$  excretion. This observation supports the 'CO<sub>2</sub> retention theory' (Wood and Perry, 1985; Perry, 1986; Perry and Wood, 1989) to explain the increase in  $P_{\text{aCO}_2}$  commonly observed after strenuous exercise or catecholamine infusion in salmonids. However, the mechanism of this inhibition remains unclear.

Our original idea was that catecholamines directly inhibited the  $\text{HCO}_3^-$  entry step, perhaps *via* a direct action on  $\text{Cl}^-/\text{HCO}_3^-$  exchange *via* band 3 (Wood and Perry, 1985; Perry, 1986). An alternative possibility, however, is that the inhibition is a consequence of  $\beta$ -adrenergic activation of the RBC  $\text{Na}^+/\text{H}^+$  antiporter, the well-known RBC pHi regulatory response (see reviews by Nikinmaa and Tufts, 1989; Thomas and Motais, 1990). Indeed, in the previous paper, the magnitude of the inhibition was correlated with the magnitude of this RBC adrenergic response, though the time courses did not appear to be identical (Wood and Perry, 1991). In theory, adrenergic stimulation of  $\text{Na}^+/\text{H}^+$  exchange and the attendant alkalization of the RBC could impede  $\text{CO}_2$  excretion by reducing the gradient for  $\text{HCO}_3^-$  entry. In consequence, the net rate of dehydration of plasma-derived  $\text{HCO}_3^-$  by erythrocytic carbonic anhydrase would be reduced. Furthermore, the abrupt alkalization of the RBC could reduce (or temporarily abolish) the normally outwardly directed  $P_{\text{CO}_2}$  gradient between RBC and plasma, as suggested previously by Thomas and Motais (1990).

The aim of the present study was to employ the new *in vitro* assay to elucidate the underlying mechanisms for adrenergic inhibition of RBC  $\text{CO}_2$  excretion. In particular, we were interested in the dose-dependency of the response with the two naturally occurring catecholamines (adrenaline and noradrenaline), the pharmacological identification of the adrenoceptors involved, and the relationship of the inhibition (if any) to activation of  $\text{Na}^+/\text{H}^+$  exchange and/or to a direct action on  $\text{Cl}^-/\text{HCO}_3^-$  exchange.

### Materials and methods

#### *Experimental animals*

Rainbow trout [*Oncorhynchus mykiss* (Walbaum)] of either sex weighing

between 175 and 225 g were obtained from Thistle Springs Trout Farm (Ashton, Ontario). Fish were maintained indoors in flowing dechlorinated and vigorously aerated City of Ottawa tapwater at 10°C, as described by Wood and Perry (1991). Prior to experiments, the trout were fitted with indwelling dorsal aortic catheters (Soivio *et al.* 1975) and allowed to recover for 48 h in opaque Perspex boxes.

*Assessment of RBC CO<sub>2</sub> excretion in vitro*

The new technique for assessing CO<sub>2</sub> excretion within trout RBCs has been described in detail in the accompanying paper (Wood and Perry, 1991) and is therefore only briefly reiterated here. Approximately 20 ml of whole blood was required for a typical single experimental run (i.e.  $N=1$ ). Thus, it was necessary to use pooled blood obtained by slow withdrawal from the dorsal aortic cannulae of 4–5 fish (3–4 ml per fish). The pooled blood (on ice) was assayed for haematocrit ( $17.5 \pm 1.5\%$ ), whole-blood pH ( $\text{pHe} = 7.84 \pm 0.03$ ) and total carbon dioxide content ( $C_{\text{CO}_2} = 5.3 \pm 0.3 \text{ mmol l}^{-1}$ ). Appropriate volumes of HCl ( $140 \text{ mmol l}^{-1}$ ) were added to simulate typical whole blood acidosis in trout immediately after exhaustive exercise (i.e.  $\text{pHe} = 7.40 \pm 0.02$ ;  $C_{\text{CO}_2} = 2.02 \pm 0.07 \text{ mmol l}^{-1}$ ; Wood and Perry, 1985). In one experimental series the blood was not acidified and in this case an equivalent volume of  $140 \text{ mmol l}^{-1}$  NaCl was added. Endogenous catecholamine levels (adrenaline plus noradrenaline) were always less than  $7 \text{ nmol l}^{-1}$ . Samples (1 ml) of acidified blood (see below) or true plasma were added to glass scintillation vials (20 ml), stoppered and gassed with a humidified gas mixture to yield  $P_{\text{CO}_2} = 0.25 \text{ kPa}$  (1.91 mmHg),  $P_{\text{O}_2} = 20.7 \text{ kPa}$  (155 mmHg), remainder N<sub>2</sub>, for 2 h at ambient water temperature in a shaking water bath. The gas mixture was provided by a gas-mixing pump (Wösthoff model M 301a/f).

2  $\mu\text{Ci}$  (10  $\mu\text{l}$  of 200  $\mu\text{Ci ml}^{-1}$ ) of sodium [<sup>14</sup>C]bicarbonate (in teleost Ringer) was added to each 1 ml of blood or plasma. The vial was then immediately sealed with a rubber septum, from which was suspended a plastic well containing a filter paper trap (150  $\mu\text{l}$  of hyamine hydroxide) for CO<sub>2</sub>, and shaking was started. After exactly 3 min of shaking, the filter was removed and assayed for <sup>14</sup>C activity. Whole-blood or true plasma pH was determined and the remaining blood centrifuged (12 000  $g$  for 2 min). The pellet was utilized to determine RBC pHi according to the freeze-thaw method (Zeidler and Kim, 1977). Samples of true plasma were assayed for <sup>14</sup>C activity (50  $\mu\text{l}$ ) and  $C_{\text{CO}_2}$  (100  $\mu\text{l}$ ) to determine plasma HCO<sub>3</sub><sup>-</sup> specific activity (disints min<sup>-1</sup>  $\mu\text{mol}^{-1}$ ). Analytical techniques and calculations were identical to those described by Wood and Perry (1991). RBC CO<sub>2</sub> excretion rate was calculated by subtracting the plasma CO<sub>2</sub> excretion rate from the whole-blood rate. This procedure, therefore, allows an assessment of the rate of CO<sub>2</sub> excretion arising only from the dehydration of plasma HCO<sub>3</sub><sup>-</sup>.

Assays were performed 5 min after addition of 10  $\mu\text{l}$  of freshly prepared catecholamine (L-adrenaline bitartrate, L-noradrenaline bitartrate; Sigma) or adrenoceptor agonist (L-isoproterenol bitartrate, phenylephrine HCl; Sigma) in  $140 \text{ mmol l}^{-1}$  NaCl to yield nominal final concentrations of 10–1000  $\text{nmol l}^{-1}$  (adrenaline or noradrenaline) or 1000  $\text{nmol l}^{-1}$  (isoproterenol, phenylephrine). In

controls, 10  $\mu\text{l}$  of 140  $\text{mmol l}^{-1}$  NaCl was added to each vial. In one experimental series, 50  $\mu\text{l}$  of the adrenoceptor antagonists ( $2 \times 10^{-4}$   $\text{mol l}^{-1}$ ) propranolol ( $\beta$ -adrenoceptor antagonist; Sigma) or phentolamine ( $\alpha$ -adrenoceptor antagonist; Ciba-Geigy) was added to samples of blood 30 min prior to addition of 1000  $\text{nmol l}^{-1}$  noradrenaline to achieve final nominal antagonist levels of  $1 \times 10^{-5}$   $\text{mol l}^{-1}$ ; 50  $\mu\text{l}$  of 140  $\text{mmol l}^{-1}$  NaCl was added to control vials. In another experimental series, utilising 1000  $\text{nmol l}^{-1}$  noradrenaline, blood was pre-incubated for 30 min with 50  $\mu\text{l}$  of the antiporter inhibitors amiloride HCl ( $\text{Na}^+/\text{H}^+$  exchange blocker; Sigma) or SITS (4-acetamido-4-isothiocyanatostilbene-2,2-disulphonic acid;  $\text{Cl}^-/\text{HCO}_3^-$  exchange blocker; Sigma) dissolved in 2% dimethyl sulphoxide (DMSO) to yield final nominal concentrations of  $1 \times 10^{-4}$   $\text{mol l}^{-1}$  in 0.1% DMSO; 50  $\mu\text{l}$  of 2% DMSO was added to control vials.

An additional series of experiments was performed using non-acidified blood. In this instance a simple comparison was made between the effects of 1000  $\text{nmol l}^{-1}$  noradrenaline on  $\text{HCO}_3^-$  dehydration in acidified and non-acidified blood.

#### Statistical analysis

All values shown are means  $\pm 1$  standard error of the mean (S.E.M.). The results have been statistically analyzed using factorial analysis of variance followed by Fisher's LSD multiple-comparison test; 5% was taken as the fiducial limit of significance.

### Results

The acute addition of catecholamines to acidified whole blood caused a dose-dependent inhibition of  $\text{CO}_2$  excretion within RBCs. The effect of noradrenaline was more pronounced than that of adrenaline (Fig. 1). A concentration of 10  $\text{nmol l}^{-1}$  noradrenaline caused a significant 23% inhibition of  $\text{CO}_2$  excretion, whereas a 10-fold higher concentration of adrenaline was required to elicit a

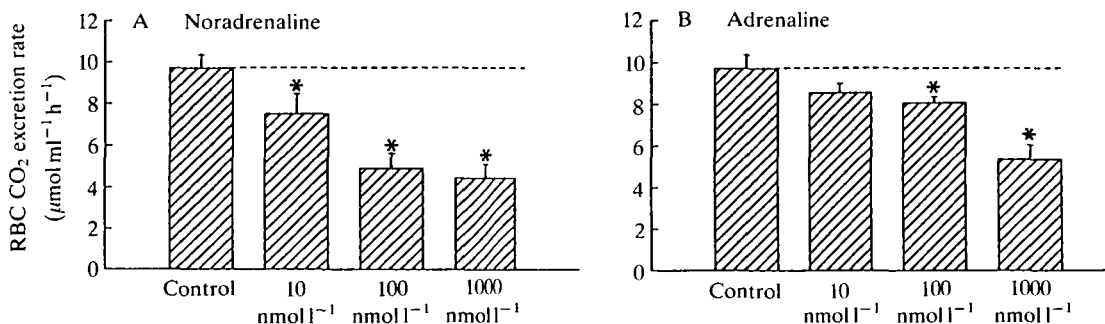

Fig. 1. The dose-dependent effects of (A) noradrenaline or (B) adrenaline on red blood cell (RBC)  $\text{CO}_2$  excretion rate in trout blood *in vitro*. Values shown are means  $\pm 1$  standard error of the mean (S.E.M.);  $N=6$  in all cases. \* indicates a significant difference ( $P < 0.05$ ) from the control value.

Table 1. The dose-dependent effects of the catecholamines, noradrenaline (NA) or adrenaline (AD) on whole-blood pH (pHe), RBC intracellular pH (pHi) and the RBC transmembrane pH gradient (pHe-pHi)

| Treatment                    | pHe             | pHi             | pHe-pHi          |
|------------------------------|-----------------|-----------------|------------------|
| Control                      | 7.421±0.04 (5)  | 7.117±0.02 (5)  | 0.304±0.02 (5)   |
| 10 nmol l <sup>-1</sup> NA   | 7.308±0.06 (5)  | 7.146±0.02 (5)  | 0.162±0.05 (5)*  |
| 100 nmol l <sup>-1</sup> NA  | 7.084±0.04 (5)* | 7.156±0.02 (5)* | -0.074±0.02 (5)* |
| 1000 nmol l <sup>-1</sup> NA | 7.007±0.03 (5)* | 7.197±0.02 (5)* | -0.190±0.02 (5)* |
| 10 nmol l <sup>-1</sup> AD   | 7.287±0.03 (5)* | 7.150±0.03 (5)  | 0.137±0.03 (5)*  |
| 100 nmol l <sup>-1</sup> AD  | 7.282±0.03 (5)* | 7.151±0.02 (5)* | 0.131±0.04 (5)*  |
| 1000 nmol l <sup>-1</sup> AD | 7.123±0.02 (5)* | 7.185±0.02 (5)* | -0.064±0.01 (5)* |

All measurements were made at the end of the assay, 8 min after the addition of catecholamine.  
 Values shown are means±1 s.e.m. (N); \* indicates significantly different (*P*<0.05) from control value.

similar degree of inhibition. At the highest concentrations (1000 nmol l<sup>-1</sup>) utilised, RBC CO<sub>2</sub> excretion was reduced by 54% and 45% by noradrenaline and adrenaline, respectively. The catecholamines also induced pronounced and dose-dependent reductions in the RBC transmembrane pH gradient (pHe-pHi), owing to simultaneous changes in both pHe and pHi (Table 1).

Fig. 2 illustrates the effects of a variety of adrenoceptor antagonists and agonists on RBC CO<sub>2</sub> excretion. Pre-incubation of whole blood for 30 min with the β-adrenoceptor antagonist propranolol (10<sup>-5</sup> mol l<sup>-1</sup>) entirely abolished the inhibitory effect of noradrenaline (1000 nmol l<sup>-1</sup>) on CO<sub>2</sub> excretion as well as preventing the usual changes in pHe, pHi and pHe-pHi (Table 2). In contrast, pre-incubation with an equivalent concentration of the α-adrenoceptor antagonist phentolamine did not significantly alter the effects of noradrenaline on either CO<sub>2</sub> excretion or pHe, pHi or pHe-pHi (Fig. 2; Table 2). Addition of these antagonists alone was without effect on any measured or calculated variable (Fig. 2; Table 2). The β-adrenoceptor agonist isoproterenol (1000 nmol l<sup>-1</sup>) mimicked the effects of an equivalent dose of noradrenaline, whereas the α-adrenoceptor agonist phenylephrine (1000 nmol l<sup>-1</sup>) had no effect on CO<sub>2</sub> excretion (Fig. 2), although it did significantly affect blood acid-base status (Table 2).

In an attempt to elucidate the post-receptor mechanism by which catecholamines inhibit CO<sub>2</sub> excretion, the effects of noradrenaline (1000 nmol l<sup>-1</sup>) were assessed in the presence or absence of the Na<sup>+</sup>/H<sup>+</sup> exchange blocker amiloride (10<sup>-4</sup> mol l<sup>-1</sup>) or the Cl<sup>-</sup>/HCO<sub>3</sub><sup>-</sup> exchange blocker SITS (10<sup>-4</sup> mol l<sup>-1</sup>). Incubation of whole blood with amiloride prevented the usual adrenergic inhibition of CO<sub>2</sub> excretion (Fig. 3). In addition, the changes in pHe and pHe-pHi were significantly reduced by amiloride (Table 3), indicating that this treatment was indeed effective in blocking (at least partially) the Na<sup>+</sup>/H<sup>+</sup> exchanger. Amiloride alone did not affect the rate of RBC CO<sub>2</sub> excretion (Fig. 3). The addition of SITS

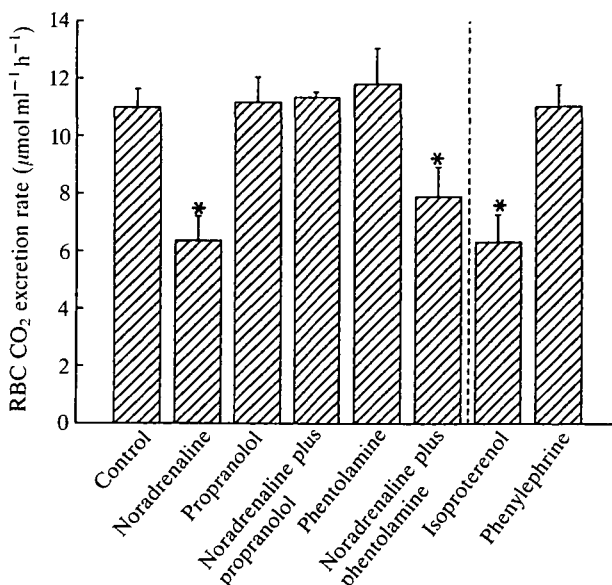

Fig. 2. The effects of  $1000 \text{ nmol l}^{-1}$  noradrenaline,  $\beta$ -adrenoceptor blockade with propranolol ( $10^{-5} \text{ mol l}^{-1}$ ),  $\alpha$ -adrenoceptor blockade with phentolamine ( $10^{-5} \text{ mol l}^{-1}$ ), the  $\beta$ -adrenoceptor agonist isoproterenol ( $1000 \text{ nmol l}^{-1}$ ) and the  $\alpha$ -adrenoceptor agonist phenylephrine ( $1000 \text{ nmol l}^{-1}$ ) on red blood cell (RBC)  $\text{CO}_2$  excretion rate *in vitro*. Values shown are means  $\pm$  1 s.e.m.;  $N=6$  in all cases. \* indicates a significant difference ( $P<0.05$ ) from the control value.

Table 2. The effects of noradrenaline,  $\beta$ -adrenoceptor blockade (propranolol,  $10^{-5} \text{ mol l}^{-1}$ )  $\alpha$ -adrenoceptor blockade (phentolamine,  $10^{-5} \text{ mol l}^{-1}$ ), the  $\beta$ -adrenoceptor agonist isoproterenol ( $1000 \text{ nmol l}^{-1}$ ) and the  $\alpha$ -adrenoceptor agonist phenylephrine ( $1000 \text{ nmol l}^{-1}$ ) on whole-blood pH (pHe), RBC intracellular pH (pHi) and the RBC transmembrane pH gradient (pHe-pHi)

| Treatment                     | pHe                   | pHi                   | pHe-pHi                |
|-------------------------------|-----------------------|-----------------------|------------------------|
| Control                       | $7.471 \pm 0.03$ (6)  | $7.132 \pm 0.01$ (6)  | $0.339 \pm 0.02$ (6)   |
| $1000 \text{ nmol l}^{-1}$ NA | $7.058 \pm 0.04$ (6)* | $7.219 \pm 0.03$ (6)* | $-0.161 \pm 0.04$ (6)* |
| Propranolol                   | $7.437 \pm 0.03$ (6)  | $7.140 \pm 0.01$ (6)  | $0.298 \pm 0.03$ (6)   |
| NA+propranolol                | $7.463 \pm 0.02$ (6)  | $7.135 \pm 0.02$ (6)  | $0.327 \pm 0.03$ (6)   |
| Phentolamine                  | $7.454 \pm 0.03$ (6)  | $7.161 \pm 0.02$ (6)  | $0.293 \pm 0.03$ (6)   |
| NA+phentolamine               | $7.128 \pm 0.04$ (6)* | $7.228 \pm 0.01$ (6)* | $-0.100 \pm 0.04$ (6)* |
| Isoproterenol                 | $7.003 \pm 0.04$ (6)* | $7.244 \pm 0.01$ (6)* | $-0.241 \pm 0.03$ (6)* |
| Phenylephrine                 | $7.323 \pm 0.02$ (6)* | $7.176 \pm 0.02$ (6)  | $0.147 \pm 0.03$ (6)*  |

All measurements were made at the end of the assay, 8 min after the addition of  $1000 \text{ nmol l}^{-1}$  noradrenaline (NA) or isoproterenol.

Values shown are means  $\pm$  1 s.e.m. ( $N$ ); \* indicates significantly different ( $P<0.05$ ) from control value.

caused a marked 70% inhibition of CO<sub>2</sub> excretion. However, this reduced rate was further substantially inhibited by the presence of noradrenaline. Indeed, on a relative basis, the percentage inhibition (53%) by noradrenaline in SITS-treated blood was identical to that (54%) in control blood (Fig. 3).

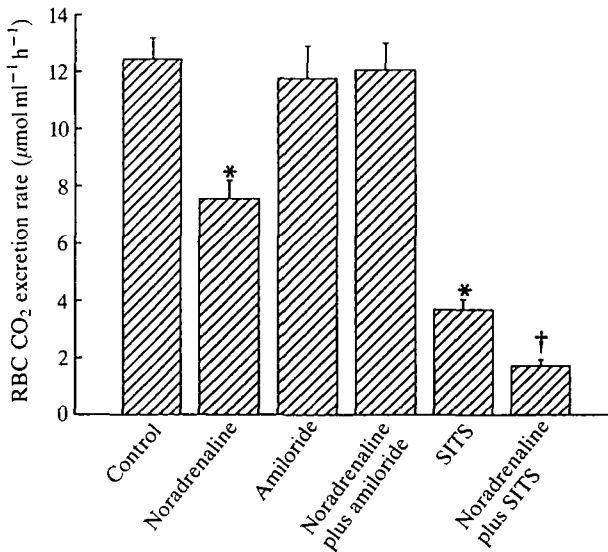

Fig. 3. The effects of 1000 nmol l<sup>-1</sup> noradrenaline on red blood cell (RBC) CO<sub>2</sub> excretion rates *in vitro* in the presence or absence of the Na<sup>+</sup>/H<sup>+</sup> and Cl<sup>-</sup>/HCO<sub>3</sub><sup>-</sup> exchange blockers amiloride (10<sup>-4</sup> mol l<sup>-1</sup>) and SITS (10<sup>-4</sup> mol l<sup>-1</sup>), respectively. Values shown are means ± 1 s.e.m.; N=6 in all cases. \* indicates a significant difference (P<0.05) from the control value; † from the value using SITS alone.

Table 3. The effects of noradrenaline (NA) on whole-blood pH (pHe), RBC intracellular pH (pHi) and the RBC transmembrane pH gradient (pHe-pHi) in the presence or absence of the Na<sup>+</sup>/H<sup>+</sup> exchange and Cl<sup>-</sup>/HCO<sub>3</sub><sup>-</sup> exchange blockers amiloride and SITS

| Treatment                    | pHe                | pHi               | pHe-pHi            |
|------------------------------|--------------------|-------------------|--------------------|
| Control                      | 7.461 ± 0.01 (6)   | 7.171 ± 0.02 (6)  | 0.293 ± 0.04 (6)   |
| 1000 nmol l <sup>-1</sup> NA | 7.069 ± 0.02 (6)*  | 7.202 ± 0.04 (6)  | -0.133 ± 0.05 (6)* |
| Amiloride                    | 7.450 ± 0.02 (6)   | 7.172 ± 0.02 (6)  | 0.278 ± 0.03 (6)   |
| NA+amiloride                 | 7.354 ± 0.01 (6)*† | 7.188 ± 0.03 (6)  | 0.166 ± 0.03 (6)*† |
| SITS                         | 7.364 ± 0.02 (6)*  | 7.171 ± 0.02 (6)  | 0.199 ± 0.04 (6)   |
| SITS+NA                      | 6.983 ± 0.01 (6)*  | 7.293 ± 0.03 (6)* | -0.313 ± 0.03 (6)* |

All measurements were made at the end of the assay, 8 min after the addition of NA (1000 nmol l<sup>-1</sup>).

Values shown are means ± 1 s.e.m. (N); \* indicates significantly different (P<0.05) from control group; † significantly different from value in the NA group.

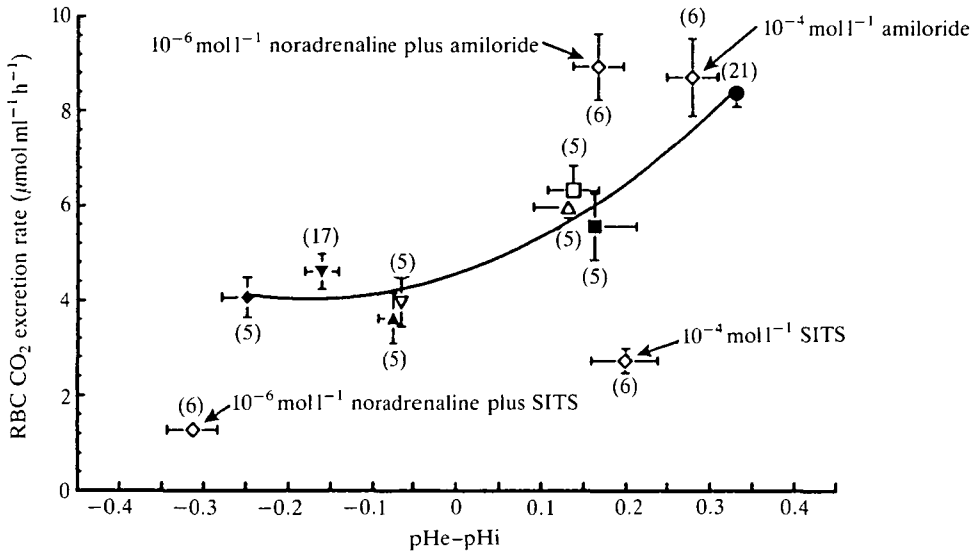

Fig. 4. The relationship (curve drawn by eye) between red blood cell (RBC) CO<sub>2</sub> excretion rate *in vitro* and the transmembrane pH gradient (pHe-pHi). This relationship was generated by monitoring dehydration rates in control blood (●; endogenous [noradrenaline]=0.84±0.2 nmol l<sup>-1</sup>, endogenous [adrenaline]=4.71±1.7 nmol l<sup>-1</sup>) and after addition of exogenous noradrenaline (10 nmol l<sup>-1</sup>=■, 100 nmol l<sup>-1</sup>=▲, 1000 nmol l<sup>-1</sup>=▼), adrenaline (10 nmol l<sup>-1</sup>=□, 100 nmol l<sup>-1</sup>=△, 1000 nmol l<sup>-1</sup>=▽) or 1000 nmol l<sup>-1</sup> isoproterenol (◆). Superimposed about this relationship are the rates of CO<sub>2</sub> excretion after addition of the Na<sup>+</sup>/H<sup>+</sup> and Cl<sup>-</sup>/HCO<sub>3</sub><sup>-</sup> exchange blockers amiloride (10<sup>-4</sup> mol l<sup>-1</sup>) and SITS (10<sup>-4</sup> mol l<sup>-1</sup>), respectively, in the presence or absence of 1000 nmol l<sup>-1</sup> noradrenaline. Values shown are means±1 s.e.m.; sample sizes are shown in parentheses.

Fig. 4 illustrates the curvilinear relationship between RBC CO<sub>2</sub> excretion and pHe-pHi which was generated using a range of concentrations (10–1000 nmol l<sup>-1</sup>) of noradrenaline and adrenaline and 1000 nmol l<sup>-1</sup> isoproterenol. These data support the hypothesis that activation of the Na<sup>+</sup>/H<sup>+</sup> exchanger (as indicated by the changes in pHe-pHi) is the mechanism underlying the adrenergic inhibition of CO<sub>2</sub> excretion. It is noteworthy that, in the presence of amiloride, noradrenaline did not elicit a reduction of CO<sub>2</sub> excretion, despite a small reduction of pHe-pHi (Fig. 4). Indeed, the rate of CO<sub>2</sub> excretion obtained in the presence of noradrenaline plus amiloride was significantly greater than that predicted from the curvilinear relationship. Possible reasons for this deviation are discussed below. Predictably, SITS (in the presence or absence of noradrenaline) caused a more pronounced inhibition of CO<sub>2</sub> excretion than predicted (Fig. 4), owing to direct inhibition of the Cl<sup>-</sup>/HCO<sub>3</sub><sup>-</sup> exchanger.

All the experiments described above were performed using acidified blood, 5–8 min after catecholamine addition, based on the protocol of Wood and Perry (1991), because the adrenergic inhibition of RBC CO<sub>2</sub> excretion was well-defined under these conditions. Furthermore, the situation was appropriate because we



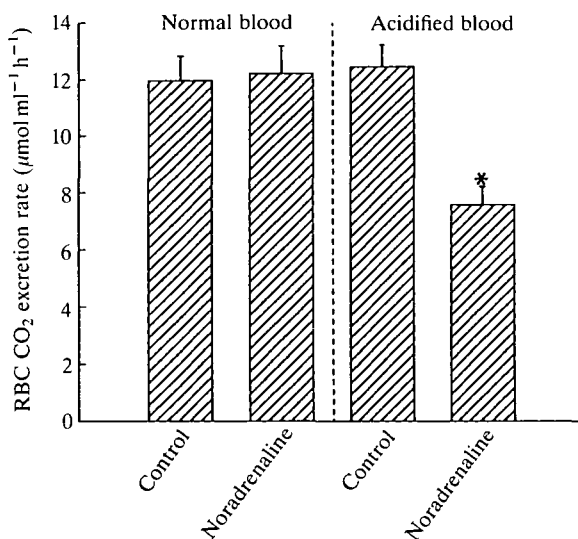

Fig. 5. The effect of  $1000 \text{ nmol l}^{-1}$  noradrenaline on red blood cell (RBC)  $\text{CO}_2$  excretion rate *in vitro* in normal (non-acidified;  $\text{pH}=7.88$ ;  $[\text{HCO}_3^-]=5.5 \text{ mmol l}^{-1}$ ) or acidified ( $\text{pH}=7.46$ ;  $[\text{HCO}_3^-]=2.1 \text{ mmol l}^{-1}$ ) blood. Values shown are means  $\pm 1 \text{ S.E.M.}$ ;  $N=6$  in each case. \* indicates a significant difference ( $P<0.05$ ) from the control value.

were testing the hypothesis that the effect is linked to activation of the  $\text{Na}^+/\text{H}^+$  exchanger, and acidification is known to enhance the responsiveness of this antiporter to catecholamines. Preliminary experiments by Wood and Perry (1991) suggested that the adrenergic inhibition of  $\text{CO}_2$  excretion was absent if the blood was kept at normal  $\text{pHe}$ . However, those trials were performed at inappropriate times (30–120 min after catecholamine addition).

Therefore, in a separate series of experiments, we tested whether acidification of the blood was indeed required to evoke adrenergic inhibition of RBC  $\text{CO}_2$  excretion. The trials were run 5–8 min after addition of noradrenaline ( $1000 \text{ nmol l}^{-1}$ ). The same original blood ( $N=6$ ), half pre-equilibrated for 2 h at normal acid–base status ( $\text{pHe}=7.88 \pm 0.02$ , plasma  $[\text{HCO}_3^-]=5.5 \pm 0.1 \text{ mmol l}^{-1}$ ) the other half pre-equilibrated for the same period under metabolic acidosis ( $\text{pHe}=7.46 \pm 0.01$ , plasma  $[\text{HCO}_3^-]=2.1 \pm 0.1 \text{ mmol l}^{-1}$ ), was used in these experiments. The results (Fig. 5) clearly demonstrated that RBC  $\text{CO}_2$  excretion is totally insensitive to noradrenaline when the blood is non-acidified, thereby supporting our contention of linkage to  $\text{Na}^+/\text{H}^+$  exchange. However, the absence of acidosis only reduced and did not abolish the  $\text{Na}^+/\text{H}^+$  exchange response. Whole-blood  $\text{pH}$  ( $\text{pHe}$ ) still fell (to  $7.58 \pm 0.03$ ) and  $\text{pHi}$  still increased slightly (from  $7.37 \pm 0.03$  to  $7.42 \pm 0.02$ ) in response to noradrenaline in non-acidified blood. Interestingly, on Fig. 4, this point lies above the predicted relationship in an identical position to the other anomalous point (noradrenaline after amiloride).

### Discussion

The results of the present study unequivocally demonstrate adrenergic inhibition of RBC  $\text{CO}_2$  excretion *in vitro* and suggest that the underlying mechanism is linked to  $\beta$ -adrenoceptor-mediated activation of the  $\text{Na}^+/\text{H}^+$  exchanger rather than *via* a direct action on the  $\text{Cl}^-/\text{HCO}_3^-$  exchanger. The involvement of RBC  $\beta$ -adrenoceptors is indicated by the experiments utilizing  $\beta$ -adrenoceptor agonists or antagonists. Although there is conflicting experimental evidence (Bennett and Rankin, 1985; Tetens *et al.* 1988), the current consensus is that the RBC  $\beta$ -adrenoceptors are of the  $\beta_1$  subtype (see review by Nikinmaa and Tufts, 1989). Our observation that noradrenaline is a more potent inhibitor than adrenaline of  $\text{CO}_2$  excretion further supports this consensus.

RBC  $\text{CO}_2$  excretion can be modified not only by direct antagonism of the  $\text{Cl}^-/\text{HCO}_3^-$  exchange on the RBC membrane (e.g. the inhibition caused by SITS; see also Perry *et al.* 1982), but also by a linkage between the  $\text{Cl}^-/\text{HCO}_3^-$  and  $\text{Na}^+/\text{H}^+$  exchange pathways. It is the latter mechanism that is the basis of the adrenergic inhibition of RBC  $\text{HCO}_3^-$  dehydration. Catecholamines cause a  $\beta$ -adrenergic, cyclic-AMP-dependent stimulation of the  $\text{Na}^+/\text{H}^+$  antiporter in the RBCs of trout and many other teleost species (Nikinmaa and Tufts, 1989). The consequent extrusion of  $\text{H}^+$  from the RBC causes a pronounced reduction of pHe, a smaller rise in RBC pHi and therefore a marked alteration of the transmembrane pH gradient (pHe–pHi). The change in pHe–pHi after adrenergic stimulation is directly related to the activity of the  $\text{Na}^+/\text{H}^+$  exchanger and is largely blocked by amiloride. Thus, the inhibitory effects of amiloride on adrenergic impairment of  $\text{CO}_2$  excretion and the observed relationship between  $\text{CO}_2$  excretion rates and pHe–pHi (Fig. 4) both support the idea that adrenergic activation of  $\text{Na}^+/\text{H}^+$  exchange is responsible for the inhibition of RBC  $\text{CO}_2$  excretion.

Although Wood and Perry (1991) portrayed a simple correlation between RBC  $\text{CO}_2$  excretion and pHe–pHi, the more extensive data of the present study suggest that the true relationship is curvilinear (Fig. 4). The inhibition by SITS was far greater than that predicted by this curvilinear relationship, and reveals the additional effect of direct inhibition of the  $\text{Cl}^-/\text{HCO}_3^-$  exchanger. The finding that noradrenaline caused an additional 53% reduction in  $\text{CO}_2$  excretion after SITS treatment (equal, on a relative basis, to its effect before SITS; Fig. 3), correlated with a large decrease in pHe–pHi (Table 3; Fig. 4), provides further evidence that the adrenergic effect is not directly on the  $\text{Cl}^-/\text{HCO}_3^-$  exchanger, but rather *via*  $\text{Na}^+/\text{H}^+$  exchange.

It is noteworthy that there was significant deviation from the predicted relationship between  $\text{CO}_2$  excretion and pHe–pHi in adrenergically stimulated blood pre-treated with amiloride (Fig. 4), and also in non-acidified blood treated with noradrenaline (identical position on Fig. 4). Specifically, the rate of  $\text{CO}_2$  excretion was greater than predicted if activation of  $\text{Na}^+/\text{H}^+$  exchange was the solitary determinant of the change in  $\text{CO}_2$  excretion rates after catecholamine addition. The most likely explanation is that these data may reflect a minor adrenergic stimulation of  $\text{CO}_2$  excretion which was unmasked by these treatments

This apparent stimulation of  $\text{CO}_2$  excretion may simply reflect the pHe-dependence of the  $\text{Cl}^-/\text{HCO}_3^-$  exchanger, the activity of which (as measured using  $\text{SO}_4^{2-}$ ) increases as extracellular pH is reduced (Romano and Passow, 1984; Fievet *et al.* 1988). The observation of stable rates of  $\text{CO}_2$  excretion in blood treated with the  $\alpha$ -adrenoceptor agonist phenylephrine (Fig. 2), despite a significant reduction of pHe–pHi (Table 2), also supports this hypothesis. The net effect of catecholamines on  $\text{CO}_2$  excretion may be the result of two opposing phenomena; an inhibitory effect linked to activation of the  $\text{Na}^+/\text{H}^+$  exchanger as well as a stimulatory component linked to the pHe-dependence of the  $\text{Cl}^-/\text{HCO}_3^-$  exchanger. Clearly, under most conditions, the inhibitory response is dominant.

The proposed mechanisms underlying the linkage between adrenergic activation of  $\text{Na}^+/\text{H}^+$  exchange and inhibition of RBC  $\text{CO}_2$  excretion are as follows. Activation of the  $\text{Na}^+/\text{H}^+$  exchanger and concurrent alkalization of the RBC must cause an immediate rise in intracellular  $\text{HCO}_3^-$  levels, owing to physicochemical buffering and the presence of intra-erythrocytic carbonic anhydrase (Thomas and Motais, 1990). This results in a diminution of the electrochemical gradient for the inward movement of  $\text{HCO}_3^-$  and hence reduces the rate of  $\text{HCO}_3^-$  dehydration within the RBC. Unfortunately, the extracellular acid–base disequilibrium after adrenergic stimulation prevents us from calculating the changes in the transmembrane  $\text{HCO}_3^-$  gradient. It is obvious, nonetheless, that the pronounced changes in pHe–pHi must be associated with significant reductions in this gradient. Owing to the pronounced sensitivity of the RBC  $\text{CO}_2$  excretion rate to acute changes in the transmembrane  $\text{HCO}_3^-$  gradient (see Fig. 3 in Wood and Perry, 1991), it is possible to achieve significant inhibition with relatively minor changes in the  $\text{HCO}_3^-$  gradient. The other proposed mechanism causing the adrenergic reduction of  $\text{CO}_2$  excretion is  $\text{CO}_2$  recycling between the plasma and the interior of the RBC immediately after activation of the  $\text{Na}^+/\text{H}^+$  exchanger (Motais *et al.* 1989; Thomas and Motais, 1990). Under normal conditions,  $P_{\text{CO}_2}$  decreases from RBC to plasma to water, which permits effective excretion of  $\text{CO}_2$  according to existing partial pressure gradients. In our experimental apparatus, the  $P_{\text{CO}_2}$  decreases from RBC to plasma to gas phase (see Wood and Perry, 1991), which is essentially analogous to the *in vivo* situation. The massive stimulation of proton extrusion from the RBC after addition of catecholamine causes rapid formation of intracellular  $\text{HCO}_3^-$  via the catalysed hydration of  $\text{CO}_2$ . Since a significant portion of this  $\text{HCO}_3^-$  must leave the RBC in exchange for  $\text{Cl}^-$ , and  $\text{CO}_2$  cannot be reintroduced into the cell as rapidly as it is being hydrated to  $\text{HCO}_3^-$ , a major reduction of intracellular  $P_{\text{CO}_2}$  must ensue. Therefore, a portion of the  $\text{CO}_2$  formed at the uncatalysed rate from  $\text{HCO}_3^-$  and  $\text{H}^+$  in the plasma is recycled through the RBC rather than diffusing into the water (or the gas phase in the *in vitro* assay). Both the reduction of the transmembrane  $\text{HCO}_3^-$  gradient and  $\text{CO}_2$  recycling will cause a transient inhibition of net  $\text{CO}_2$  excretion *in vivo*. The  $\text{CO}_2$  recycling is associated with the phase of extracellular acid–base disequilibrium. Red blood cell  $\text{HCO}_3^-$  levels presumably remain elevated (since pHi remains elevated; see Fig. 6 of Wood and Perry, 1991) after the  $\text{Na}^+/\text{H}^+$

exchanger is once again inactivated and can therefore contribute to a more prolonged inhibition of RBC  $\text{HCO}_3^-$  dehydration. Despite this, however, we suggest that normal  $\text{CO}_2$  excretion rates are re-established *in vivo* owing to a rise in  $P_{\text{CO}_2}$  as  $\text{CO}_2$  backs up in the system, thereby restoring the transbranchial flux.

Adrenergic inhibition of RBC  $\text{CO}_2$  excretion, mediated by activation of  $\text{Na}^+/\text{H}^+$  exchange, is sufficient to account for the transitory retention of  $\text{CO}_2$  in fish blood after exhaustive exercise (Wood and Perry, 1985; Perry and Wood, 1989) and during intra-arterial catecholamine infusion (Perry and Vermette, 1987; Vermette and Perry, 1988). In the present study, this effect was demonstrated at realistic levels of catecholamines ( $10\text{--}1000\text{ nmol l}^{-1}$ ) using physiological levels of  $\text{HCO}_3^-$  in blood appropriately acidified to mimic post-exercise acidosis. Previous studies *in vivo* (Steffensen *et al.* 1987; Playle *et al.* 1990) or *in vitro* (Tufts *et al.* 1988) were unable to demonstrate adrenergic inhibition of whole-animal  $\text{CO}_2$  excretion and RBC  $\text{CO}_2$  excretion, respectively. There are several possible reasons for the discrepancy. First, we now know that the inhibitory effect of catecholamines occurs only under acidotic conditions, and not when blood pH is normal (Fig. 5). Presumably, this reflects the potentiating effects of extracellular acidosis on adrenergic stimulation of the RBC  $\text{Na}^+/\text{H}^+$  antiporter (see review by Nikinmaa and Tufts, 1989) in addition to possible allosteric modification of the  $\text{Na}^+/\text{H}^+$  antiporter itself (e.g. Aronson *et al.* 1982). Second, the response is transient, reaching a maximum after approximately 5 min and disappearing after about 30 min (Wood and Perry, 1991). Third, inhibition of  $\text{HCO}_3^-$  dehydration *in vivo* would cause a rise in  $P_{\text{CO}_2}$  of the blood and quickly re-establish  $\text{CO}_2$  excretion at a new steady state (see above). Thus, inappropriate methodology and/or sampling times may have prevented detection of adrenergic responses in other studies. Fourth, the protocol of acutely raising the blood  $\text{HCO}_3^-$  concentration to  $100\text{ mmol l}^{-1}$  in the 'boat' technique (Tufts *et al.* 1988) may have obscured the proposed linkage between RBC  $\text{CO}_2$  excretion and activation of  $\text{Na}^+/\text{H}^+$  exchange in that study.

The functional significance of adrenergic inhibition of  $\text{CO}_2$  excretion is unclear but may be related to the control of ventilation. For example, after exhausting exercise fish are motionless and blood oxygen status is unchanged so stimulation of neither proprioceptors nor oxygen chemoreceptors can account for the observed hyperventilation at this time. Recent studies (Heisler *et al.* 1988; R. Kinkead and S. F. Perry, unpublished results; Wood *et al.* 1990) have shown that relatively small changes in blood pH and/or  $P_{\text{CO}_2}$  have marked effects on ventilation in fish. Moreover, injection of bovine carbonic anhydrase into the circulation of rainbow trout not only reduced the rise in  $P_{\text{aCO}_2}$  but also significantly depressed the post-exercise hyperventilation (Perry and Wood, 1989). Thus, we suggest that adrenergic inhibition of RBC  $\text{CO}_2$  excretion and the associated respiratory acidosis after vigorous exercise serve to increase gill ventilation in the absence of other appropriate ventilatory stimulants.

This research was supported by NSERC of Canada Operating and Equipment

grants to S.F.P. and C.M.W. and an NSF grant (DCB-8608728) to P.J.W. We are grateful to Dr R. Motais for helpful discussions.

### References

- ARONSON, P. S., NEE, J. AND SUHM, M. A. (1982). Modifier role of internal H<sup>+</sup> in activating the Na<sup>+</sup>-H<sup>+</sup> exchanger in renal microvillus membrane vesicles. *Nature* **299**, 161-163.
- BENNETT, M. B. AND RANKIN, J. C. (1985). Identification of  $\beta$ -adrenergic receptors in teleost red blood cells. *Comp. Biochem. Physiol.* **81C**, 411-414.
- FIEVET, B., CLAIREAUX, G., THOMAS, S. AND MOTAIS, R. (1988). Adaptive respiratory responses of trout to acute hypoxia. III. Ion movements and pH changes in the red blood cell. *Respir. Physiol.* **74**, 99-114.
- HEISLER, N., TOEWS, D. P. AND HOLETON, G. F. (1988). Regulation of ventilation and acid-base status in the elasmobranch *Scyliorhinus stellaris* during hyperoxia induced hypercapnia. *Respir. Physiol.* **71**, 227-246.
- MOTAIS, R., FIEVET, B., GARCIA-ROMEY, F. AND THOMAS, S. (1989). Na<sup>+</sup>/H<sup>+</sup> exchange and pH regulation in red blood cells: The role of uncatalysed H<sub>2</sub>CO<sub>3</sub> dehydration. *Am. J. Physiol.* **256**, C728-C735.
- NIKINMAA, M. AND TUFTS, B. L. (1989). Regulation of acid and ion transfer across the membrane of nucleated erythrocytes. *Can. J. Zool.* **67**, 3039-3045.
- PERRY, S. F. (1986). Carbon dioxide excretion in fishes. *Can. J. Zool.* **64**, 565-572.
- PERRY, S. F., DAVIE, P. S., DAXBOECK, C. AND RANDALL, D. J. (1982). A comparison of CO<sub>2</sub> excretion in a spontaneously ventilating blood-perfused trout preparation and saline-perfused gill preparations: contribution of the branchial epithelium and red blood cell. *J. exp. Biol.* **101**, 47-60.
- PERRY, S. F. AND VERMETTE, M. G. (1987). The effects of prolonged epinephrine infusion on the physiology of rainbow trout, *Salmo gairdneri*. I. Blood respiratory, acid-base and ionic status. *J. exp. Biol.* **128**, 235-253.
- PERRY, S. F. AND WOOD, C. M. (1989). Control and coordination of gas transfer in fishes. *Can. J. Zool.* **67**, 2961-2970.
- PLAYLE, R. C., MUNGER, R. S. AND WOOD, C. M. (1990). Catecholamine effects on gas exchange and ventilation in rainbow trout (*Salmo gairdneri*). *J. exp. Biol.* **152**, 353-367.
- ROMANO, L. AND PASSOW, H. (1984). Characterization of anion transport system in trout red blood cell. *Am. J. Physiol.* **246**, C330-C338.
- SOIVIO, A., NYHOLM, K. AND WESTMAN, K. (1975). A technique for repeated blood sampling of the blood of individual resting fish. *J. exp. Biol.* **62**, 207-217.
- STEFFENSEN, J. F., TUFTS, B. L. AND RANDALL, D. J. (1987). Effect of burst swimming and adrenaline infusion on O<sub>2</sub> consumption and CO<sub>2</sub> excretion in rainbow trout, *Salmo gairdneri*. *J. exp. Biol.* **131**, 427-434.
- TETENS, V., LYKKEBOE, G. AND CHRISTENSEN, N. J. (1988). Potency of adrenaline and noradrenaline for adrenergic proton extrusion from red cells of rainbow trout, *Salmo gairdneri*. *J. exp. Biol.* **134**, 267-280.
- THOMAS, S. AND MOTAIS, R. (1990). Acid-base balance and oxygen transport during acute hypoxia in fish. In *Animal Nutrition and Transport Processes, 2, Transport, Respiration and Excretion: Comparative and Environmental Aspects* (ed. J. P. Truchot and B. Lahlou). *Comp. Physiol.* **6**, 76-91. Basel: Karger.
- TUFTS, B. L., FERGUSON, R. A. AND BOUTILIER, R. G. (1988). *In vivo* and *in vitro* effects of adrenergic stimulation on chloride/bicarbonate exchange in rainbow trout erythrocytes. *J. exp. Biol.* **140**, 301-312.
- VERMETTE, M. G. AND PERRY, S. F. (1988). Effects of prolonged epinephrine infusion on blood respiratory and acid-base states in the rainbow trout: Alpha and beta effects. *Fish Physiol. Biochem.* **4**, 189-202.
- WOOD, C. M. AND PERRY, S. F. (1985). Respiratory, circulatory and metabolic adjustments to exercise in fish. In *Circulation, Respiration and Metabolism* (ed R. Gilles), pp. 1-22. Berlin: Springer-Verlag.

- WOOD, C. M. AND PERRY, S. F. (1991). A new *in vitro* assay for carbon dioxide excretion by trout red blood cells: effects of catecholamines. *J. exp. Biol.* **157**, 349–366.
- WOOD, C. M., TURNER, J. D., MUNGER, R. S. AND GRAHAM, M. S. (1990). The control of ventilation in the skate (*Raja ocellata*). II. Cerebrospinal fluid chemistry, and intracellular pH in the brain and other tissues. *Respir. Physiol.* **80**, 279–298.
- ZEIDLER, R. AND KIM, D. H. (1977). Preferential hemolysis of postnatal calf red cells induced by internal alkalinization. *J. gen. Physiol.* **70**, 385–401.
